# Supplementary material
Source: PubMed Central journal article supplement (PMC6855930)
Supplement: djz039_supplementary_data.pdf [file djz039_supplementary_data.pdf]

## SUPPLEMENTARY MATERIALS

Supplementary Table 1. Multivariable adjusted\* odds ratio (OR) and 95% confidence intervals (CI) estimates for characteristics associated with later stage† at cancer diagnosis among adolescent and young adults with 9 common cancers, 2005-2014, California

| Characteristics                               | Stage II-IV (vs I) | Stage III-IV (vs I-II) |
|-----------------------------------------------|--------------------|------------------------|
|                                               | OR (95% CI)        | OR (95% CI)            |
| Age at diagnosis, years                       |                    |                        |
| 15-19                                         | Reference          | Reference              |
| 20-24                                         | 1.05 (0.93, 1.18)  | 1.05 (0.94, 1.18)      |
| 25-29                                         | 1.00 (0.89, 1.12)  | 1.03 (0.92, 1.15)      |
| 30-34                                         | 0.98 (0.87, 1.10)  | 0.99 (0.89, 1.11)      |
| 35-39                                         | 1.00 (0.89, 1.12)  | 0.98 (0.88, 1.10)      |
| Sex                                           |                    |                        |
| Male                                          | Reference          | Reference              |
| Female                                        | 0.71 (0.65, 0.76)  | 0.68 (0.63, 0.73)      |
| Year of diagnosis                             |                    |                        |
| Mar 2005 - Dec 2009                           | Reference          | Reference              |
| Jan 2010 - Dec 2014                           | 0.89 (0.85, 0.93)  | 0.90 (0.86, 0.94)      |
| Comorbidity                                   |                    |                        |
| 0                                             | Reference          | Reference              |
| 1                                             | 1.20 (1.10,1.31)   | 1.17 (1.08,1.28)       |
| >1                                            | 1.74 (1.42,2.13)   | 2.23 (1.87,2.65)       |
| Missing                                       | 0.84 (0.80,0.89)   | 0.86 (0.82,0.91)       |
| Marital status                                |                    |                        |
| Married                                       | Reference          | Reference              |
| Not Married                                   | 1.05 (1.00, 1.10)  | 1.03 (0.98, 1.09)      |
| Unknown                                       | 0.85 (0.76, 0.95)  | 0.75 (0.66, 0.84)      |
| Facility type                                 |                    |                        |
| NCI-designated                                | Reference          | Reference              |
| Non NCI-designated                            | 0.65 (0.62, 0.69)  | 0.67 (0.64, 0.71)      |
| Race/ethnicity                                |                    |                        |
| Non-Hispanic white                            | Reference          | Reference              |
| Non-Hispanic black                            | 1.30 (1.16, 1.46)  | 1.37 (1.24, 1.52)      |
| Hispanic                                      | 1.19 (1.12, 1.26)  | 1.08 (1.02, 1.14)      |
| Asian/Pacific Islander                        | 1.02 (0.95, 1.10)  | 0.98 (0.91, 1.05)      |
| American Indian/Alaskan Native                | 0.96 (0.72, 1.26)  | 0.93 (0.70, 1.23)      |
| Other/Unknown                                 | 0.58 (0.49, 0.69)  | 0.53 (0.42, 0.65)      |
| Urban/ rural residence                        |                    |                        |
| Urban                                         | Reference          | Reference              |
| Rural                                         | 1.02 (0.94,1.09)   | 0.97 (0.91,1.05)       |
| Neighborhood socioeconomic status (quintiles) |                    |                        |
| 5 (highest)                                   | Reference          | Reference              |

|                        |                   |                   |
|------------------------|-------------------|-------------------|
| 4                      | 1.09 (1.02, 1.16) | 1.07 (0.99, 1.15) |
| 3                      | 1.25 (1.16, 1.34) | 1.20 (1.11, 1.29) |
| 2                      | 1.30 (1.20, 1.40) | 1.29 (1.20, 1.39) |
| 1 (lowest)             | 1.36 (1.25, 1.47) | 1.39 (1.28, 1.51) |
| Health insurance       |                   |                   |
| Private/ military      | Reference         | Reference         |
| Continuous Medicaid    | 1.48 (1.38, 1.60) | 1.39 (1.30, 1.50) |
| Discontinuous Medicaid | 1.89 (1.68, 2.12) | 1.74 (1.57, 1.94) |
| Medicaid at diagnosis  | 2.31 (2.12, 2.52) | 2.09 (1.94, 2.25) |
| Other public           | 1.01 (0.85, 1.21) | 1.24 (1.05, 1.47) |
| Uninsured              | 1.28 (1.13, 1.46) | 1.31 (1.15, 1.49) |
| Unknown                | 1.17 (1.00, 1.36) | 1.08 (0.91, 1.28) |

\*Adjusted for all variables in the Table and cancer type.

†Unknown stage was imputed into AJCC stage categories based on 5-year survival for each cancer type: melanoma was grouped into stage I; Hodgkin lymphoma, non-Hodgkin lymphoma and testicular cancer were grouped into stage II; breast, cervical, colorectal and thyroid cancer were grouped into Stage III; and ovarian cancer was grouped into stage IV.

Supplementary Table 2. Multivariable adjusted\* odds ratio (OR) and 95% confidence intervals (CI) estimates for characteristics associated with later stage at cancer diagnosis among adolescent and young adults with 9 common cancers, 2005-2014, California

| Characteristics                               | Stage II (vs I)   | Stage III (vs I)  | Stage IV (vs I)   |
|-----------------------------------------------|-------------------|-------------------|-------------------|
|                                               | OR (95% CI)       | OR (95% CI)       | OR (95% CI)       |
| Age at diagnosis, years                       |                   |                   |                   |
| 15-19                                         | Reference         | Reference         | Reference         |
| 20-24                                         | 0.97 (0.83, 1.12) | 0.99 (0.85, 1.16) | 1.05 (0.86, 1.27) |
| 25-29                                         | 0.91 (0.78, 1.05) | 0.89 (0.77, 1.03) | 1.15 (0.96, 1.38) |
| 30-34                                         | 0.91 (0.79, 1.05) | 0.89 (0.77, 1.03) | 1.11 (0.92, 1.32) |
| 35-39                                         | 0.94 (0.82, 1.09) | 0.89 (0.77, 1.03) | 1.12 (0.94, 1.34) |
| Sex                                           |                   |                   |                   |
| Male                                          | Reference         | Reference         | Reference         |
| Female                                        | 0.84 (0.77, 0.92) | 0.61 (0.55, 0.67) | 0.65 (0.59, 0.72) |
| Year of diagnosis                             |                   |                   |                   |
| Mar 2005 - Dec 2009                           | Reference         | Reference         | Reference         |
| Jan 2010 - Dec 2014                           | 0.96 (0.91, 1.02) | 0.95 (0.89, 1.00) | 0.98 (0.91, 1.06) |
| Comorbidity                                   |                   |                   |                   |
| 0                                             | Reference         | Reference         | Reference         |
| 1                                             | 1.15 (1.03, 1.29) | 1.25 (1.12, 1.40) | 1.26 (1.10, 1.44) |
| >1                                            | 1.03 (0.77, 1.36) | 1.78 (1.37, 2.26) | 3.02 (2.34, 3.90) |
| Missing                                       | 0.82 (0.77, 0.87) | 0.72 (0.67, 0.78) | 0.68 (0.62, 0.75) |
| Marital status                                |                   |                   |                   |
| Married                                       | Reference         | Reference         | Reference         |
| Not Married                                   | 1.06 (1.00, 1.13) | 1.02 (0.95, 1.09) | 1.12 (1.03, 1.22) |
| Unknown                                       | 0.88 (0.77, 1.02) | 0.59 (0.50, 0.69) | 0.74 (0.60, 0.91) |
| Facility type                                 |                   |                   |                   |
| NCI-designated                                | Reference         | Reference         | Reference         |
| Non NCI-designated                            | 0.69 (0.64, 0.74) | 0.60 (0.56, 0.64) | 0.52 (0.47, 0.57) |
| Race/ethnicity                                |                   |                   |                   |
| Non-Hispanic white                            | Reference         | Reference         | Reference         |
| Non-Hispanic black                            | 1.13 (0.99, 1.30) | 1.42 (1.24, 1.64) | 1.55 (1.32, 1.82) |
| Hispanic                                      | 1.23 (1.14, 1.32) | 1.24 (1.15, 1.34) | 1.21 (1.10, 1.34) |
| Asian/Pacific Islander                        | 1.06 (0.97, 1.16) | 0.97 (0.88, 1.08) | 1.03 (0.91, 1.16) |
| American Indian/Alaskan                       | 1.01 (0.71, 1.45) | 0.99 (0.70, 1.42) | 0.77 (0.46, 1.28) |
| Native                                        |                   |                   |                   |
| Other/Unknown                                 | 0.48 (0.37, 0.63) | 0.32 (0.23, 0.46) | 0.28 (0.18, 0.46) |
| Urban/ rural residence                        |                   |                   |                   |
| Urban                                         | Reference         | Reference         | Reference         |
| Rural                                         | 1.02 (0.93, 1.12) | 1.04 (0.94, 1.14) | 0.87 (0.77, 0.99) |
| Neighborhood socioeconomic status (quintiles) |                   |                   |                   |
| 5 (highest)                                   | Reference         | Reference         | Reference         |
| 4                                             | 1.10 (1.01, 1.20) | 1.13 (1.03, 1.24) | 1.10 (0.98, 1.24) |
| 3                                             | 1.25 (1.14, 1.36) | 1.34 (1.22, 1.48) | 1.29 (1.14, 1.46) |

|                         |                   |                   |                   |
|-------------------------|-------------------|-------------------|-------------------|
| 2                       | 1.22 (1.11, 1.34) | 1.46 (1.32, 1.61) | 1.32 (1.16, 1.51) |
| 1 (lowest)              | 1.21 (1.09, 1.34) | 1.58 (1.42, 1.76) | 1.41 (1.23, 1.61) |
| <b>Health insurance</b> |                   |                   |                   |
| Private/ military       | Reference         | Reference         | Reference         |
| Continuous Medicaid     | 1.34 (1.22, 1.47) | 1.52 (1.38, 1.68) | 1.80 (1.60, 2.03) |
| Discontinuous Medicaid  | 1.63 (1.40, 1.89) | 1.98 (1.72, 2.29) | 2.61 (2.19, 3.12) |
| Medicaid at diagnosis   | 1.89 (1.71, 2.10) | 2.58 (2.34, 2.86) | 3.82 (3.38, 4.31) |
| Other public            | 0.82 (0.65, 1.04) | 1.09 (0.88, 1.36) | 1.14 (0.85, 1.52) |
| Uninsured               | 1.15 (0.97, 1.36) | 1.24 (1.05, 1.47) | 1.52 (1.22, 1.91) |
| Unknown                 | 0.57 (0.44, 0.74) | 0.57 (0.42, 0.77) | 0.93 (0.67, 1.29) |

---

\*Adjusted for all variables in the Table and cancer type.

Supplementary Table 3 Multivariable adjusted\* odds ratio (OR) and 95% confidence intervals (CI) estimates for characteristics associated with later stage at cancer diagnosis among adolescent and young adults with 9 common cancers and Medicaid health insurance, 2005-2014, California

| Characteristics                               | Stage II-IV (vs I) | Stage III-IV (vs I-II) |
|-----------------------------------------------|--------------------|------------------------|
|                                               | OR (95% CI)        | OR (95% CI)            |
| Age at diagnosis, y                           |                    |                        |
| 15-19                                         | Reference          | Reference              |
| 20-24                                         | 1.12 (0.91, 1.37)  | 1.14 (0.95, 1.37)      |
| 25-29                                         | 1.06 (0.88, 1.29)  | 1.19 (1.00, 1.42)      |
| 30-34                                         | 1.10 (0.91, 1.33)  | 1.15 (0.96, 1.37)      |
| 35-39                                         | 1.09 (0.90, 1.32)  | 1.13 (0.95, 1.35)      |
| Sex                                           |                    |                        |
| Male                                          | Reference          | Reference              |
| Female                                        | 0.71 (0.60, 0.84)  | 0.63 (0.55, 0.72)      |
| Year of diagnosis                             |                    |                        |
| Mar 2005 - Dec 2009                           | Reference          | Reference              |
| Jan 2010 - Dec 2014                           | 0.90 (0.82, 0.99)  | 0.96 (0.89, 1.05)      |
| Comorbidity                                   |                    |                        |
| 0                                             | Reference          | Reference              |
| 1                                             | 1.30 (1.10, 1.54)  | 1.28 (1.11, 1.47)      |
| >1                                            | 1.72 (1.28, 2.31)  | 2.09 (1.63, 2.69)      |
| Missing                                       | 0.81 (0.72, 0.90)  | 0.86 (0.78, 0.95)      |
| Marital status                                |                    |                        |
| Married                                       | Reference          | Reference              |
| Not Married                                   | 1.06 (0.96, 1.18)  | 1.11 (1.01, 1.22)      |
| Unknown                                       | 0.79 (0.61, 1.02)  | 0.66 (0.51, 0.86)      |
| Facility type                                 |                    |                        |
| NCI-designated                                | Reference          | Reference              |
| Non NCI-designated                            | 0.71 (0.64, 0.78)  | 0.74 (0.67, 0.81)      |
| Race/ethnicity                                |                    |                        |
| Non-Hispanic white                            | Reference          | Reference              |
| Non-Hispanic black                            | 1.29 (1.06, 1.57)  | 1.43 (1.21, 1.68)      |
| Hispanic                                      | 1.14 (1.02, 1.28)  | 1.07 (0.97, 1.19)      |
| Asian/Pacific Islander                        | 0.99 (0.82, 1.20)  | 1.06 (0.90, 1.25)      |
| American Indian/Alaskan Native                | 0.92 (0.58, 1.48)  | 0.61 (0.38, 0.98)      |
| Other/Unknown                                 | 0.32 (0.18, 0.57)  | 0.28 (0.14, 0.59)      |
| Urban/ rural residence                        |                    |                        |
| Urban                                         | Reference          | Reference              |
| Rural                                         | 0.95 (0.84, 1.09)  | 0.94 (0.83, 1.06)      |
| Neighborhood socioeconomic status (quintiles) |                    |                        |
| 5 (highest)                                   | Reference          | Reference              |
| 4                                             | 0.89 (0.72, 1.10)  | 0.98 (0.81, 1.19)      |
| 3                                             | 1.04 (0.85, 1.28)  | 1.10 (0.92, 1.32)      |

|                        |                   |                   |
|------------------------|-------------------|-------------------|
| 2                      | 1.12 (0.92, 1.36) | 1.24 (1.04, 1.48) |
| 1 (lowest)             | 1.21 (1.00, 1.46) | 1.29 (1.08, 1.54) |
| Health insurance       |                   |                   |
| Continuous Medicaid    | Reference         | Reference         |
| Discontinuous Medicaid | 1.28 (1.12, 1.46) | 1.20 (1.06, 1.36) |
| Medicaid at diagnosis  | 1.63 (1.47, 1.81) | 1.49 (1.36, 1.64) |

---

\*Adjusted for all variables in the Table and cancer type.

Supplementary Table 4. Multivariable adjusted\* odds ratio (OR) and 95% confidence interval (CI) estimates for associations between health insurance type and stage† at cancer diagnosis among adolescent and young adults, by cancer type, 2005-2014, California

| Health Insurance Type       | Stage II-IV (vs I) | Stage III-IV (vs I-II) |
|-----------------------------|--------------------|------------------------|
|                             | OR (95% CI)        | OR (95% CI)            |
| <b>Breast</b>               |                    |                        |
| Private/Military            | Reference          | Reference              |
| Continuous Medicaid         | 1.67 (1.41, 1.97)  | 1.57 (1.38, 1.80)      |
| Discontinuous Medicaid      | 2.14 (1.58, 2.91)  | 1.86 (1.51, 2.30)      |
| Medicaid at diagnosis       | 1.78 (1.50, 2.11)  | 1.70 (1.48, 1.94)      |
| Other public                | 1.51 (0.84, 2.72)  | 2.18 (1.39, 3.43)      |
| Uninsured                   | 1.36 (0.88, 2.09)  | 1.64 (1.15, 2.32)      |
| Unknown                     | 1.18 (0.67, 2.09)  | 2.74 (1.72, 4.39)      |
| <b>Thyroid</b>              |                    |                        |
| Private/Military            | Reference          | Reference              |
| Continuous Medicaid         | 1.15 (0.81, 1.64)  | 0.77 (0.47, 1.27)      |
| Discontinuous Medicaid      | 1.46 (0.78, 2.73)  | 1.54 (0.72, 3.32)      |
| Medicaid at diagnosis       | 2.03 (1.14, 3.63)  | 1.91 (0.90, 4.05)      |
| Other public                | 1.04 (0.41, 2.64)  | 0.68 (0.16, 2.86)      |
| Uninsured                   | 1.00 (0.48, 2.11)  | 0.79 (0.28, 2.20)      |
| Unknown                     | 3.61 (2.10, 6.24)  | 4.72 (2.61, 8.55)      |
| <b>Melanoma</b>             |                    |                        |
| Private/Military            | Reference          | Reference              |
| Continuous Medicaid         | 1.85 (1.40, 2.45)  | 1.65 (1.19, 2.29)      |
| Discontinuous Medicaid      | 2.40 (1.48, 3.89)  | 1.88 (1.08, 3.26)      |
| Medicaid at diagnosis       | 4.14 (2.92, 5.86)  | 4.41 (3.08, 6.33)      |
| Other public                | 2.58 (1.52, 4.39)  | 2.22 (1.22, 4.02)      |
| Uninsured                   | 1.32 (0.88, 1.98)  | 1.43 (0.89, 2.30)      |
| Unknown                     | 0.52 (0.33, 0.81)  | 0.35 (0.17, 0.74)      |
| <b>Testicular</b>           |                    |                        |
| Private/Military            | Reference          | Reference              |
| Continuous Medicaid         | 1.51 (1.26, 1.80)  | 1.57 (1.26, 1.95)      |
| Discontinuous Medicaid      | 1.96 (1.56, 2.47)  | 1.95 (1.48, 2.56)      |
| Medicaid at diagnosis       | 2.97 (2.51, 3.52)  | 3.87 (3.21, 4.67)      |
| Other public                | 0.74 (0.55, 1.01)  | 0.79 (0.52, 1.19)      |
| Uninsured                   | 1.01 (0.81, 1.25)  | 1.07 (0.81, 1.42)      |
| Unknown                     | 1.30 (0.92, 1.83)  | 0.52 (0.27, 1.03)      |
| <b>Non-Hodgkin lymphoma</b> |                    |                        |
| Private/Military            | Reference          | Reference              |
| Continuous Medicaid         | 1.40 (1.13, 1.75)  | 1.23 (1.01, 1.51)      |
| Discontinuous Medicaid      | 1.76 (1.29, 2.41)  | 1.45 (1.10, 1.92)      |
| Medicaid at diagnosis       | 1.45 (1.16, 1.80)  | 1.69 (1.38, 2.06)      |
| Other public                | 1.02 (0.64, 1.62)  | 0.93 (0.59, 1.47)      |

|                         |                   |                   |
|-------------------------|-------------------|-------------------|
| Uninsured               | 1.28 (0.87, 1.89) | 0.95 (0.65, 1.40) |
| Unknown                 | 2.34 (1.57, 3.49) | 0.80 (0.52, 1.24) |
| <b>Hodgkin lymphoma</b> |                   |                   |
| Private/Military        | Reference         | Reference         |
| Continuous Medicaid     | 0.96 (0.67, 1.38) | 1.14 (0.91, 1.42) |
| Discontinuous Medicaid  | 1.35 (0.77, 2.35) | 1.63 (1.19, 2.23) |
| Medicaid at diagnosis   | 1.73 (1.14, 2.63) | 1.68 (1.35, 2.09) |
| Other public            | 0.73 (0.42, 1.29) | 1.56 (1.05, 2.32) |
| Uninsured               | 2.48 (1.19, 5.16) | 1.37 (0.98, 1.92) |
| Unknown                 | 0.73 (0.39, 1.38) | 0.56 (0.33, 0.96) |
| <b>Cervical</b>         |                   |                   |
| Private/Military        | Reference         | Reference         |
| Continuous Medicaid     | 1.59 (1.31, 1.93) | 1.47 (1.20, 1.80) |
| Discontinuous Medicaid  | 2.00 (1.51, 2.63) | 1.75 (1.31, 2.33) |
| Medicaid at diagnosis   | 2.77 (2.20, 3.48) | 2.20 (1.74, 2.78) |
| Other public            | 1.59 (0.87, 2.89) | 1.62 (0.87, 3.01) |
| Uninsured               | 2.80 (1.70, 4.59) | 1.90 (1.14, 3.16) |
| Unknown                 | 3.41 (2.02, 5.77) | 4.46 (2.62, 7.58) |
| <b>Colorectal</b>       |                   |                   |
| Private/Military        | Reference         | Reference         |
| Continuous Medicaid     | 1.27 (0.94, 1.71) | 1.11 (0.89, 1.38) |
| Discontinuous Medicaid  | 1.72 (1.00, 2.94) | 1.56 (1.06, 2.28) |
| Medicaid at diagnosis   | 3.56 (2.25, 5.63) | 1.79 (1.40, 2.31) |
| Other public            | 1.27 (0.59, 2.74) | 1.16 (0.68, 1.99) |
| Uninsured               | 1.13 (0.66, 1.92) | 1.08 (0.73, 1.60) |
| Unknown                 | 1.00 (0.46, 2.18) | 1.99 (1.03, 3.86) |
| <b>Ovarian</b>          |                   |                   |
| Private/Military        | Reference         | Reference         |
| Continuous Medicaid     | 1.43 (1.06, 1.94) | 1.45 (1.07, 1.97) |
| Discontinuous Medicaid  | 1.57 (0.99, 2.50) | 1.51 (0.95, 2.40) |
| Medicaid at diagnosis   | 2.47 (1.75, 3.49) | 2.25 (1.60, 3.16) |
| Other public            | 0.59 (0.30, 1.18) | 0.67 (0.33, 1.36) |
| Uninsured               | 1.75 (1.07, 2.85) | 2.07 (1.27, 3.37) |
| Unknown                 | 1.27 (0.50, 3.25) | 1.65 (0.65, 4.23) |

\*Each cancer site considered separately and adjusted for age group, sex, comorbidity, marital status, facility type, race/ethnicity, urban/rural residence, neighborhood socioeconomic status and year of diagnosis.

†Unknown stage was imputed into AJCC stage categories based on 5-year survival for each cancer type: melanoma was grouped into stage I; Hodgkin lymphoma, non-Hodgkin lymphoma and testicular cancer were grouped into stage II; breast, cervical, colorectal and thyroid cancer were grouped into Stage III; and ovarian cancer was grouped into stage IV.



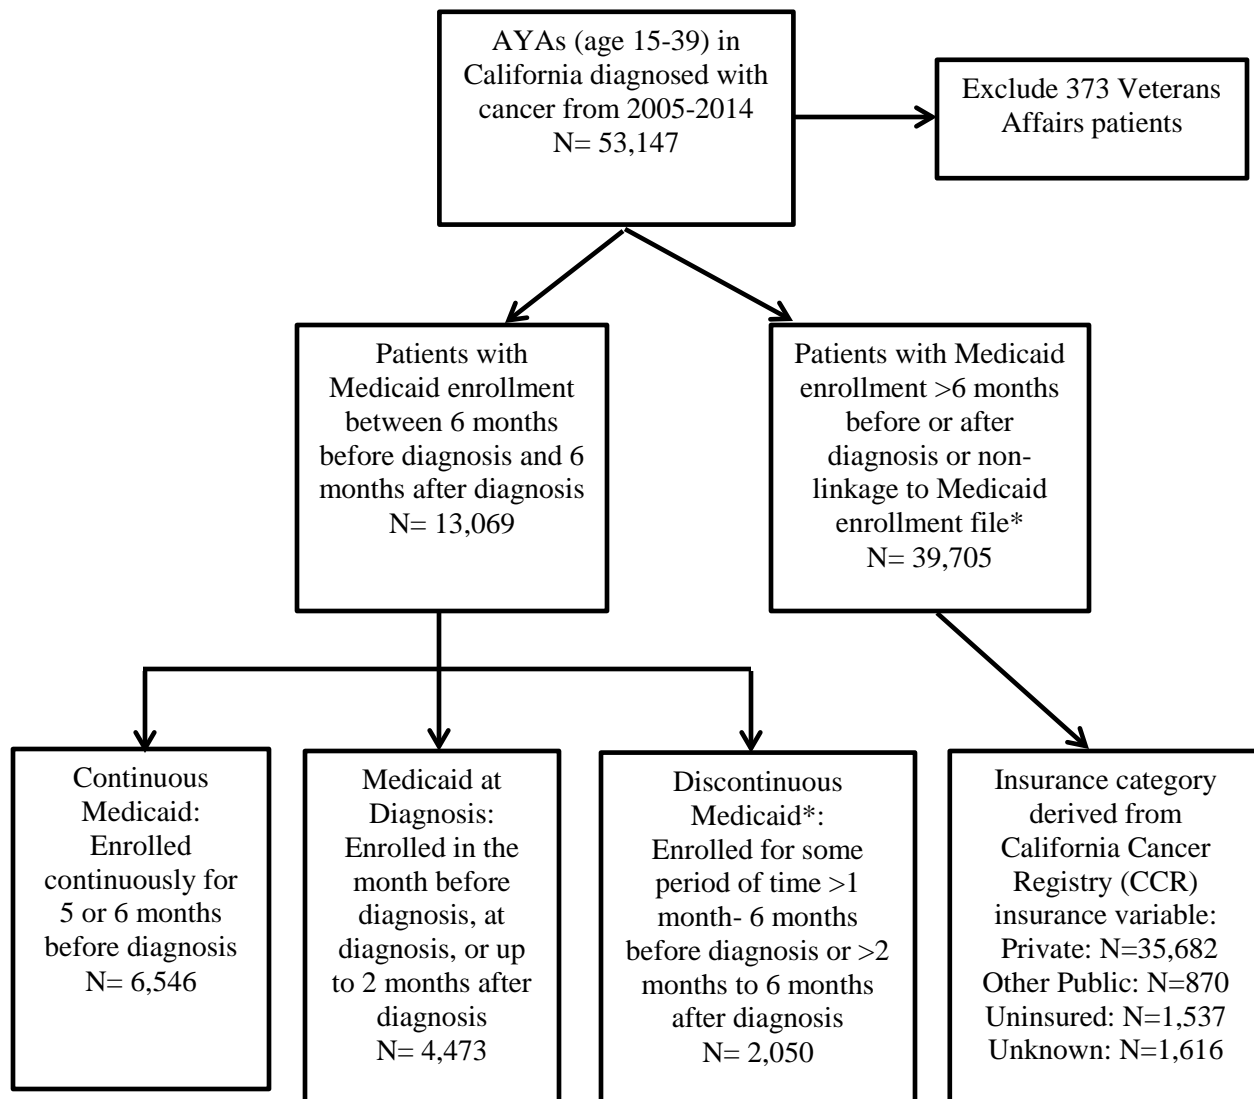

Supplementary Figure 1: Classification of health insurance among adolescents and young adults (AYAs) diagnosed with 9 common cancers. \*Discontinuous Medicaid includes 32 patients with Medicaid insurance recorded in the CCR but non-linkage to Medicaid enrollment file.
